# Supplementary material
Source: Frontiers journal article supplement (https://www.frontiersin.org/articles/490012)
Supplement: Data_Sheet_1.PDF [file Data_Sheet_1.PDF]

Title page

**The Binding of PD-L1 and Akt Facilitates Glioma Cell Invasion upon Starvation  
via Akt/autophagy/F-actin Signaling**

Ruo Qiao Chen<sup>1,†</sup>, Xiao Hong Xu<sup>2,†</sup>, Feng Liu<sup>2</sup>, Chun Yang Li<sup>2</sup>, Yuan Jun Li<sup>2</sup>, Xiang  
Rui Li<sup>1</sup>, Guo Yong Jiang<sup>1</sup>, Feng Hu<sup>3</sup>, Di Liu<sup>4</sup>, Feng Pan<sup>4\*</sup>, Xin Yao Qiu<sup>2\*</sup>, Xiao Qian  
Chen<sup>2\*</sup>

<sup>1</sup>School of Basic Medicine, Tongji Medical College, Huazhong University of Science and Technology, Wuhan, Hubei, China

<sup>2</sup>Department of Pathophysiology, School of Basic Medicine, Tongji Medical College, Huazhong University of Science and Technology, Wuhan, Hubei, China

<sup>3</sup>Department of Neurosurgery, Tongji hospital, Tongji medical college, Huazhong University of Science and Technology, Wuhan, Hubei, China

<sup>4</sup>Department of Urology, Union Hospital, Tongji Medical College, Huazhong University of Science and Technology, Wuhan, Hubei, China

\*Correspondence: Feng Pan, [panfeng@hust.edu.cn](mailto:panfeng@hust.edu.cn); Xin Yao Qiu, [qiu.xinyao1991@outlook.com](mailto:qiu.xinyao1991@outlook.com); Xiao Qian Chen, [chenxq@mails.tjmu.edu.cn](mailto:chenxq@mails.tjmu.edu.cn)

<sup>†</sup>These authors have contributed equally to this work

Conflicts of Interest Statement: The authors declare no conflicts of interest.

Running title: PD-L1/Akt interaction promotes GBM invasion

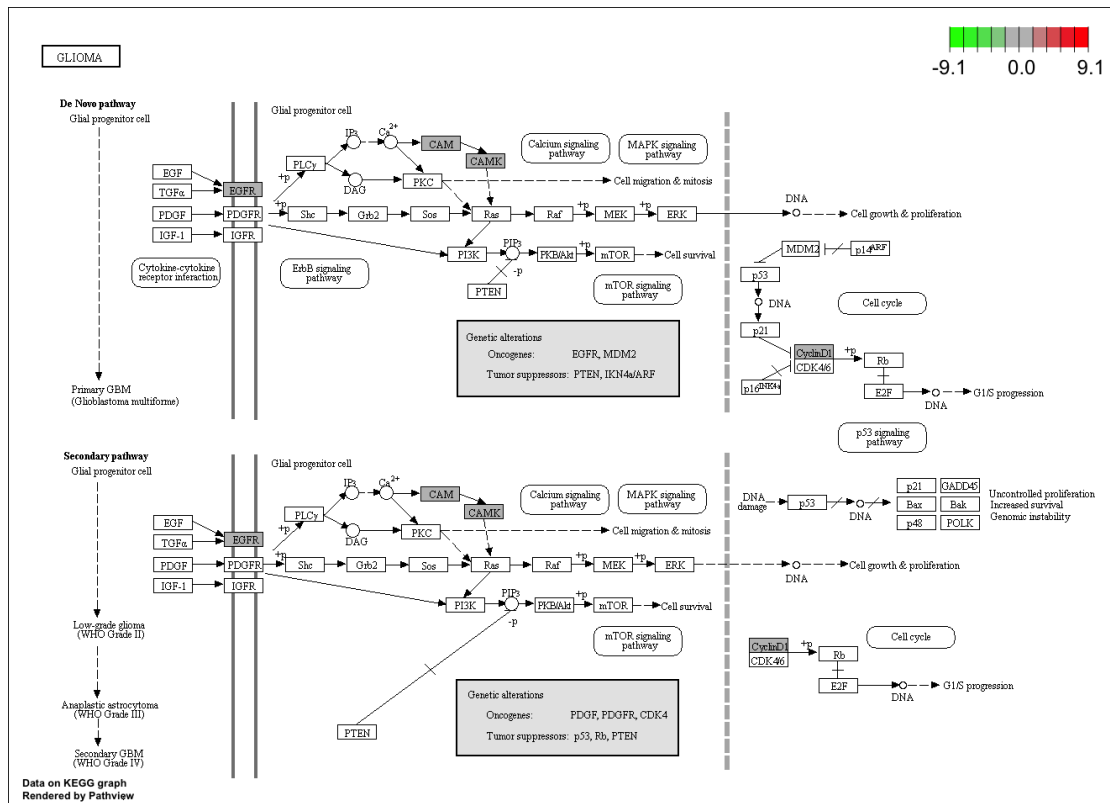

Figure S1. KEGG pathway analysis of PD-L1-altered genes in human glioma.



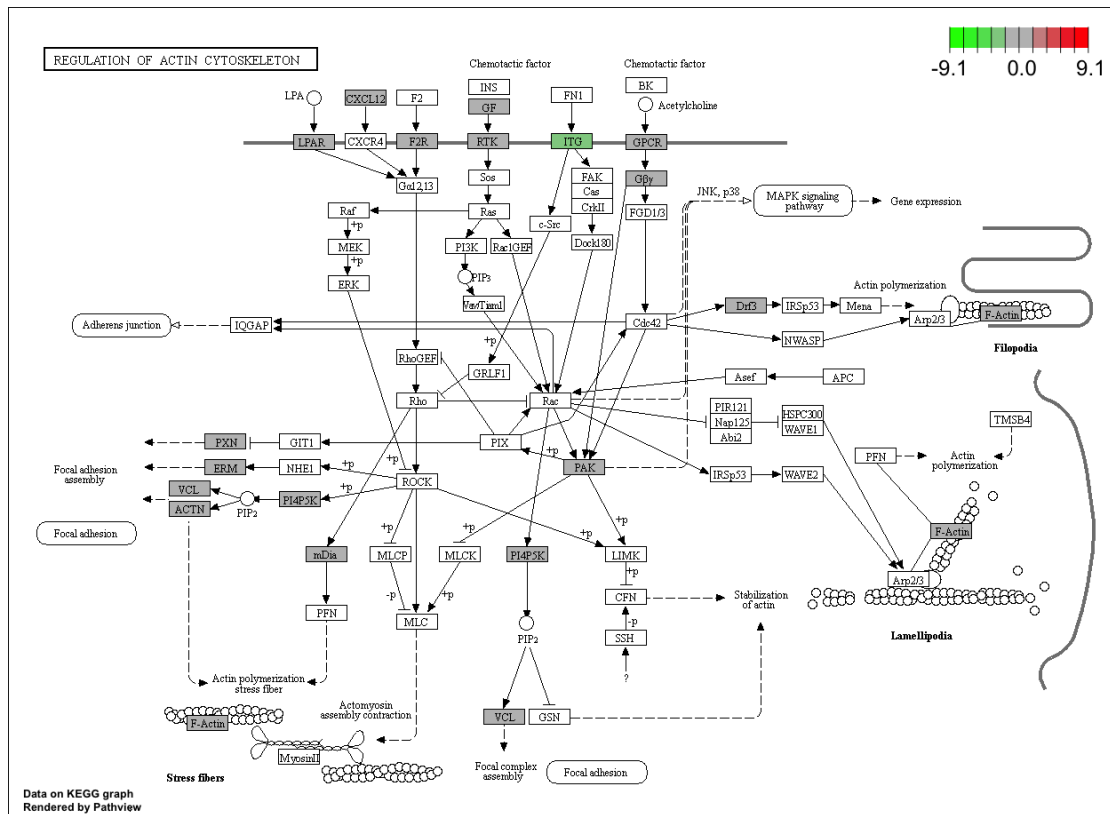

Figure S3. KEGG pathway analysis of PD-L1-altered genes in regulation of actin cytoskeleton.

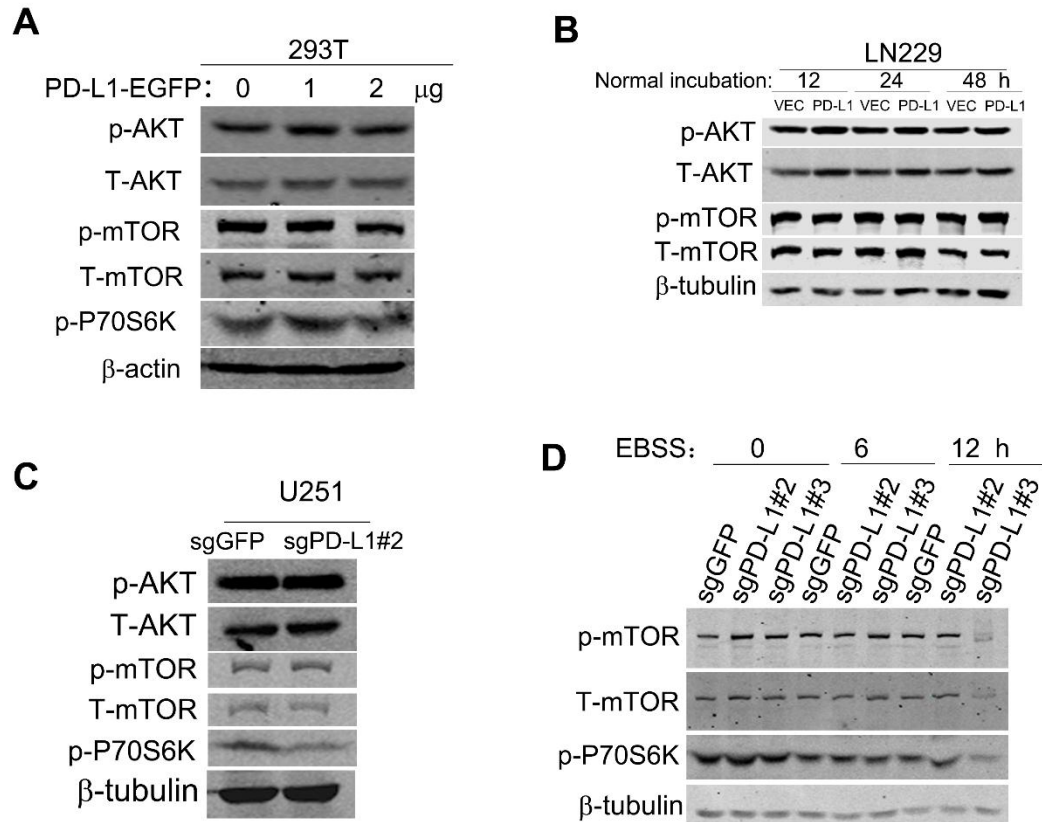

Figure S4. Effects of PD-L1 on Akt/mTOR signaling. (A) Effects of pPD-L1-EGFP plasmid transfection of different plasmid amounts on p-Akt, Akt, p-mTOR, mTOR, p-P70S6K expression in 29T cells. (B) Effects of PD-L1 overexpression on p-Akt, Akt, p-mTOR, mTOR expression in LN229 cells at various time points after initial cell seeding. (C) Effects of PD-L1 knockout (sgCD274#2) on p-Akt, Akt, p-mTOR, mTOR, p-P70S6K expression in U251 cells. (D) Effects of PD-L1 knockout (sgCD274#2, #3) on p-mTOR, mTOR, p-P70S6K expression in U251 cells upon EBSS incubation.

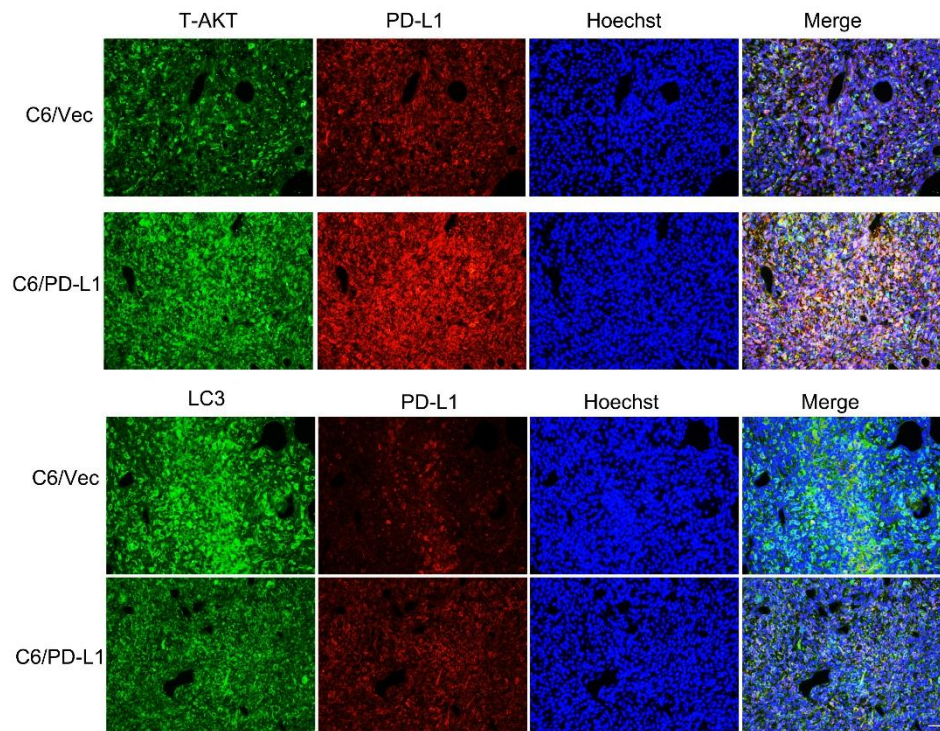

Figure S5. Double fluorescent-immunostaining shows the effects of PD-L1 overexpression on Akt and LC3 expression in orthotopic rat/C6 glioma tissues. C6 cells were lentiviral-infected for PD-L1 overexpression (C6/PD-L1). Equal amounts of C6/PD-L1 or C6/Vec were microinjected into right striatum of rats and the glioma tissues were subjected to analysis at 20 d after initial C6 cells injection. Bar, 20  $\mu$ m.

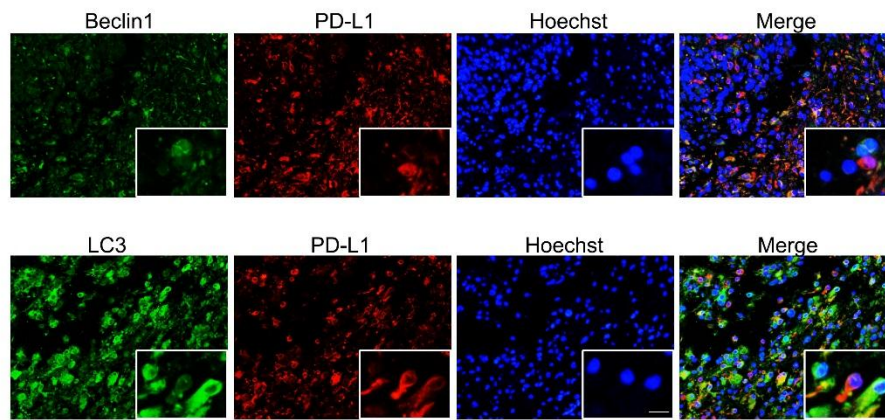

Figure S6. Double fluorescent immunostaining shows that higher PD-L1 expression in individual GBM cells is associated with lower Beclin-1 and LC3 expression in GBM patient tissue. Bar, 20  $\mu\text{m}$ .

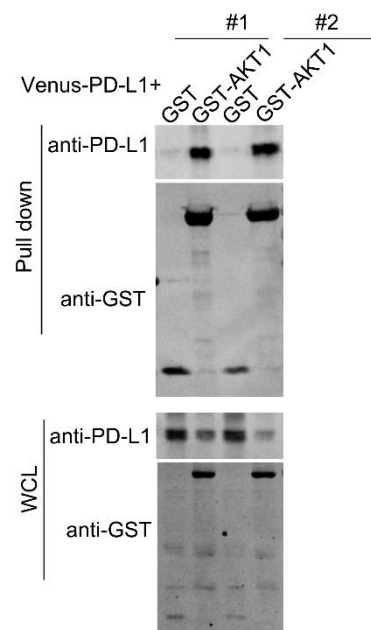

Figure S7. GST-pull down shows that PD-L1 binds to Akt. WCL, whole cell lysate.
